# Supplementary material
Source: PubMed Central journal article supplement (PMC4137359)
Supplement: Supp_Data.pdf [file Supp_Data.pdf]

## Supplementary Data

SUPPLEMENTARY TABLE S1. PRIMERS USED FOR REAL-TIME REVERSE TRANSCRIPTION-POLYMERASE CHAIN REACTION

|               | <i>Forward primer sequence (5'-3')</i> | <i>Reverse primer sequence (5'-3')</i> |
|---------------|----------------------------------------|----------------------------------------|
| Genes (human) |                                        |                                        |
| GAPDH         | TATTCTCTGATTTGGTCGTA                   | ATGGCAACAATATCCACT                     |
| $\alpha$ -SMA | AGACTTCCGCTTCAATTC                     | CTGTTAGGACCTTCCCTC                     |
| Calponin      | ACACAACACTACAATTCC                     | TCTCTCAAACCTCTAACC                     |
| Desmin        | AGGAGAGCCGGATCAATCTCC                  | TCCCGTGTCTCGATGGTCTT                   |
| Tropomyosin   | CTCTCAGAAGGCCAAGTCCG                   | TCAGCTTGTCGGAAAGGACC                   |
| Smoothelin    | TGAGGAGCTGATGACTATT                    | CTGATCCAGCATCTTGTC                     |
| Caveolin-1    | GTTCCGAGAGAGGTAGAC                     | GTGGAAGACGAGGTTTC                      |
| Profilin-2    | GCGTCTTTCAGAGCATTAC                    | CGTTGGTAAAGAAACCTTCC                   |
| Tissue factor | TTGTGAAGGATGTGAAGC                     | AGGTTTGTCTCCAGGTAA                     |
| IL-6          | CTGGATTCAATGAGGAGAC                    | AATCTGTTCTGGAGGTACT                    |
| MCP-1         | TTCCTCTTGAACCACAGT                     | CTTGCAAAGACCCTCAA                      |
| ICAM-1        | GACTAAGCCAAGAGGAAG                     | CTCAGCATACCCAATAGG                     |
| VCAM-1        | CCTGCCATTGGAATGATAA                    | TGCTTCTACAAGACTATATGAC                 |
| RhoA          | AGGAAGATTATGATCGCCTG                   | TTCTAAACTATCAGGGCTGTC                  |
| ROCK1         | CAAGGTGGTGTGGTTATTATG                  | ACTCCATTTTATGCGGATTC                   |
| ROCK2         | TATCACCTACAAGCATTCG                    | CTCCCTATCTGTTAAGAAAGC                  |
| LIMK2         | CAGTCACAGACGGATTTG                     | TTCTGAACACCGAAACAG                     |
| Cofilin-2     | AGTATTATCCACTGGTCAGA                   | TATATCCGTGCTGCCATA                     |
